# Supplementary material for: Transition temperature engineering of octaalkoxycarbonyl phthalocyanines
Source: Royal Society of Chemistry journal article supplement (doi:10.1039/b704344a), 2007-01-01
Supplement: b704344a.pdf [file b704344a.pdf]

## Supporting Information

*Journal of Materials Chemistry*

### Transition Temperature Engineering of Octaalkoxycarbonyl Phthalocyanines

Sergey Sergeyev, Olivier Debever, Eric Pouzet and Yves Henri Geerts\*

*Laboratory of Polymer Chemistry, Université Libre de Bruxelles (ULB), CP 206/1, Boulevard du Triomphe, 1050 Bruxelles, Belgium; e-mail ygeerts@ulb.ac.be*

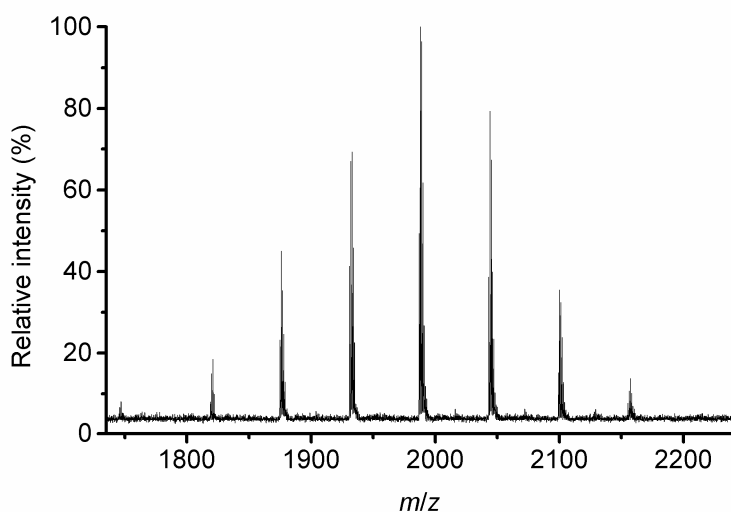

**Fig. SI 1** MALDI mass spectra of **4**

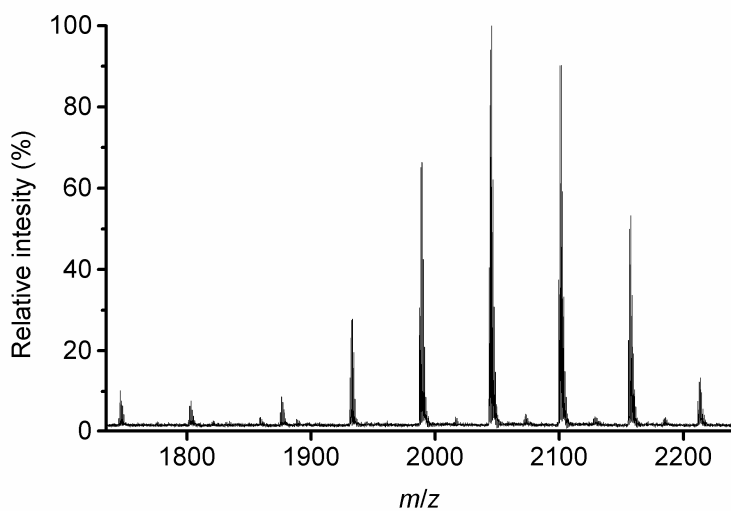

**Fig. SI 2** MALDI mass spectra of **5**

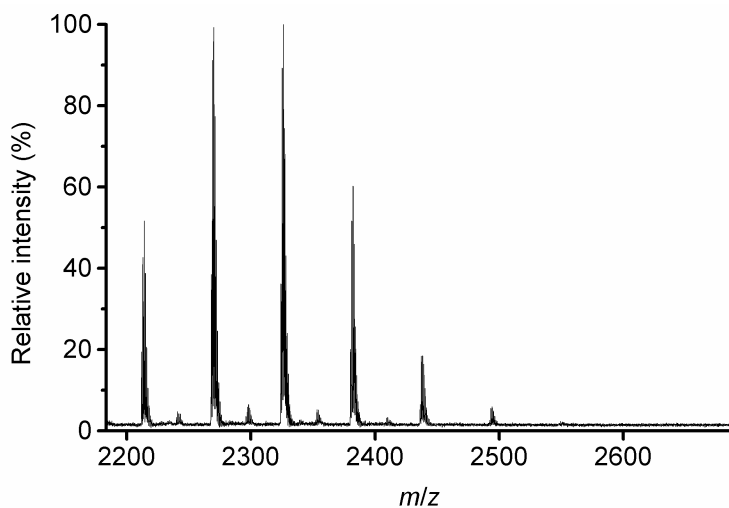

**Fig. SI 3** MALDI mass spectra of **6**

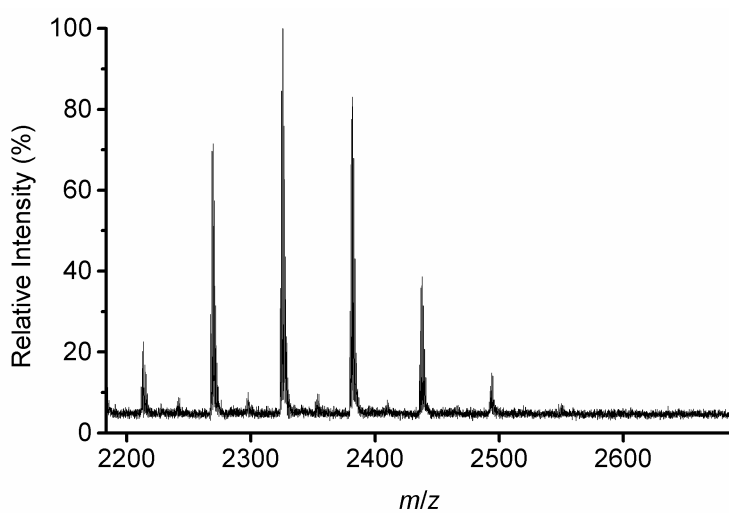

**Fig. SI 4** MALDI mass spectra of **7**

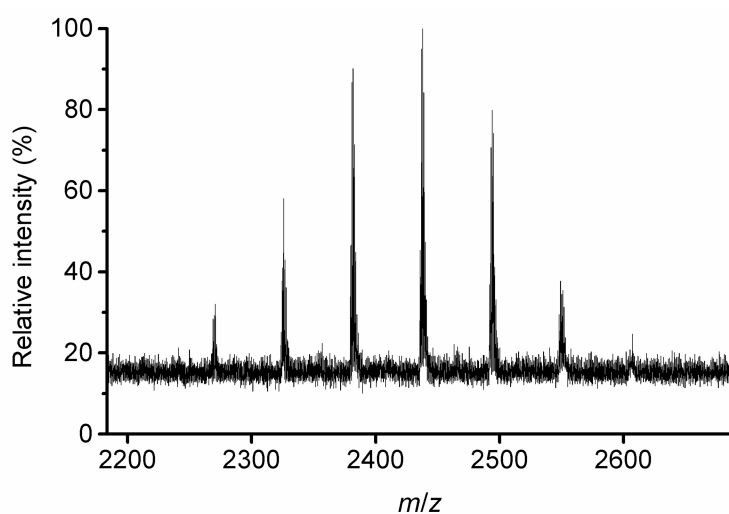

**Fig. SI 5** MALDI mass spectra of **8**

For Tables **SI 1–SI 5**, calculations have been performed as follows. Exact molecular masses and abundances of molecular ions with the lowest isotopic mass have been calculated with ChemDrawPro version 4.5 software package (CambridgeSoft Corporation). Distribution of products  $\text{Pc}(\text{COOR}^1)_n(\text{COOR}^2)_{8-n}$  were calculated as coefficients of a binomial  $(ax + by)^8$ , where  $a = 1, b = 1$  for **4** and **8**,  $a = 1, b = 2$  for **5**,  $a = 3, b = 1$  for **6**, and  $a = 2, b = 1$  for **7**. Calculated relative intensity of signals corresponding to molecular ions with the lowest isotopic mass has been obtained by multiplying of distribution of products  $\text{Pc}(\text{COOR}^1)_n(\text{COOR}^2)_{8-n}$  by the relative abundance of molecular ions with the lowest isotopic mass for each product followed by normalization (intensity of the most intense signal is taken as 100%).

**Table SI 1.** Calculated relative intensities of signals corresponding to molecular ions of individual components  $\text{Pc}(\text{COOR}^1)_n(\text{COOR}^2)_{8-n}$  in **4** ( $\text{R}^1 = \text{C}_{8,4}, \text{R}^2 = \text{C}_{6,2}$ ).

| $n$ | Calculated exact molecular mass | Distribution of products, calculated as coefficients of binomial $(x + y)^8$ | Calculated abundance of molecular ions with the lowest isotopic mass (in % of the most intense isotopic peak) | Calculated relative intensity signals corresponding to molecular ions with the lowest isotopic mass, % |
|-----|---------------------------------|------------------------------------------------------------------------------|---------------------------------------------------------------------------------------------------------------|--------------------------------------------------------------------------------------------------------|
| 0   | 1763.1                          | 1.4                                                                          | 86.5                                                                                                          | 1.6                                                                                                    |
| 1   | 1819.1                          | 11.4                                                                         | 83.2                                                                                                          | 12.7                                                                                                   |
| 2   | 1875.2                          | 40.0                                                                         | 80.3                                                                                                          | 42.9                                                                                                   |
| 3   | 1931.3                          | 80.0                                                                         | 77.5                                                                                                          | 82.8                                                                                                   |
| 4   | 1987.3                          | 100.0                                                                        | 74.9                                                                                                          | 100                                                                                                    |
| 5   | 2043.4                          | 80.0                                                                         | 72.5                                                                                                          | 77.4                                                                                                   |
| 6   | 2099.5                          | 40.0                                                                         | 70.2                                                                                                          | 37.5                                                                                                   |
| 7   | 2155.5                          | 11.4                                                                         | 68.1                                                                                                          | 10.4                                                                                                   |
| 8   | 2211.6                          | 1.4                                                                          | 66.1                                                                                                          | 1.3                                                                                                    |

**Table SI 2.** Calculated relative intensities of signals corresponding to molecular ions of individual components  $\text{Pc}(\text{COOR}^1)_n(\text{COOR}^2)_{8-n}$  in **5** ( $\text{R}^1 = \text{C}_{8,4}$ ,  $\text{R}^2 = \text{C}_{6,2}$ ).

| $n$ | Calculated exact molecular mass | Distribution of products, calculated as coefficients of binomial $(x + 2y)^8$ | Calculated abundance of molecular ions with the lowest isotopic mass (in % of the most intense isotopic peak) | Calculated relative intensity signals corresponding to molecular ions with the lowest isotopic mass, % |
|-----|---------------------------------|-------------------------------------------------------------------------------|---------------------------------------------------------------------------------------------------------------|--------------------------------------------------------------------------------------------------------|
| 0   | 1763.1                          | 0.06                                                                          | 86.5                                                                                                          | 0.07                                                                                                   |
| 1   | 1819.1                          | 0.9                                                                           | 83.2                                                                                                          | 1.0                                                                                                    |
| 2   | 1875.2                          | 6.25                                                                          | 80.3                                                                                                          | 6.9                                                                                                    |
| 3   | 1931.3                          | 25                                                                            | 77.5                                                                                                          | 26.7                                                                                                   |
| 4   | 1987.3                          | 62.5                                                                          | 74.9                                                                                                          | 64.6                                                                                                   |
| 5   | 2043.4                          | 100                                                                           | 72.5                                                                                                          | 100                                                                                                    |
| 6   | 2099.5                          | 100                                                                           | 70.2                                                                                                          | 96.8                                                                                                   |
| 7   | 2155.5                          | 57.1                                                                          | 68.1                                                                                                          | 53.7                                                                                                   |
| 8   | 2211.6                          | 14.3                                                                          | 66.1                                                                                                          | 13.0                                                                                                   |

**Table SI 3.** Calculated relative intensities of signals corresponding to molecular ions of individual components  $\text{Pc}(\text{COOR}^1)_n(\text{COOR}^2)_{8-n}$  in **6** ( $\text{R}^1 = \text{C}_{10,6}$ ,  $\text{R}^2 = \text{C}_{8,4}$ ).

| $n$ | Calculated exact molecular mass | Distribution of products, calculated as coefficients of binomial $(3x + y)^8$ | Calculated abundance of molecular ions with the lowest isotopic mass (in % of the most intense isotopic peak) | Calculated relative intensity signals corresponding to molecular ions with the lowest isotopic mass, % |
|-----|---------------------------------|-------------------------------------------------------------------------------|---------------------------------------------------------------------------------------------------------------|--------------------------------------------------------------------------------------------------------|
| 0   | 2211.6                          | 32.1                                                                          | 66.1                                                                                                          | 34.0                                                                                                   |
| 1   | 2267.6                          | 85.7                                                                          | 64.2                                                                                                          | 88.2                                                                                                   |
| 2   | 2323.7                          | 100                                                                           | 62.4                                                                                                          | 100                                                                                                    |
| 3   | 2379.8                          | 66.7                                                                          | 60.7                                                                                                          | 64.9                                                                                                   |
| 4   | 2435.8                          | 27.8                                                                          | 59.2                                                                                                          | 26.4                                                                                                   |
| 5   | 2491.9                          | 7.4                                                                           | 57.6                                                                                                          | 6.8                                                                                                    |
| 6   | 2548.0                          | 1.2                                                                           | 56.2                                                                                                          | 1.1                                                                                                    |
| 7   | 2604.0                          | 0.1                                                                           | 54.8                                                                                                          | 0.1                                                                                                    |
| 8   | 2660.1                          | 0.005                                                                         | 53.5                                                                                                          | 0.004                                                                                                  |

**Table SI 4.** Calculated relative intensities of signals corresponding to molecular ions of individual components  $\text{Pc}(\text{COOR}^1)_n(\text{COOR}^2)_{8-n}$  in **7** ( $\text{R}^1 = \text{C}_{10,6}$ ,  $\text{R}^2 = \text{C}_{8,4}$ ).

| $n$ | Calculated exact molecular mass | Distribution of products, calculated as coefficients of binomial $(2x + y)^8$ | Calculated abundance of molecular ions with the lowest isotopic mass (in % of the most intense isotopic peak) | Calculated relative intensity signals corresponding to molecular ions with the lowest isotopic mass, % |
|-----|---------------------------------|-------------------------------------------------------------------------------|---------------------------------------------------------------------------------------------------------------|--------------------------------------------------------------------------------------------------------|
| 0   | 2211.6                          | 14.3                                                                          | 66.1                                                                                                          | 15.1                                                                                                   |
| 1   | 2267.6                          | 57.1                                                                          | 64.2                                                                                                          | 58.8                                                                                                   |
| 2   | 2323.7                          | 100                                                                           | 62.4                                                                                                          | 100                                                                                                    |
| 3   | 2379.8                          | 100                                                                           | 60.7                                                                                                          | 97.3                                                                                                   |
| 4   | 2435.8                          | 62.5                                                                          | 59.2                                                                                                          | 59.3                                                                                                   |
| 5   | 2491.9                          | 25                                                                            | 57.6                                                                                                          | 23.1                                                                                                   |
| 6   | 2548.0                          | 6.25                                                                          | 56.2                                                                                                          | 5.6                                                                                                    |
| 7   | 2604.0                          | 0.9                                                                           | 54.8                                                                                                          | 0.8                                                                                                    |
| 8   | 2660.1                          | 0.06                                                                          | 53.5                                                                                                          | 0.05                                                                                                   |

**Table SI 5.** Calculated relative intensities of signals corresponding to molecular ions of individual components  $\text{Pc}(\text{COOR}^1)_n(\text{COOR}^2)_{8-n}$  in **8** ( $\text{R}^1 = \text{C}_{10,6}$ ,  $\text{R}^2 = \text{C}_{8,4}$ ).

| $n$ | Calculated exact molecular mass | Distribution of products, calculated as coefficients of binomial $(x + y)^8$ | Calculated abundance of molecular ions with the lowest isotopic mass (in % of the most intense isotopic peak) | Calculated relative intensity signals corresponding to molecular ions with the lowest isotopic mass, % |
|-----|---------------------------------|------------------------------------------------------------------------------|---------------------------------------------------------------------------------------------------------------|--------------------------------------------------------------------------------------------------------|
| 0   | 2211.6                          | 1.4                                                                          | 66.1                                                                                                          | 1.6                                                                                                    |
| 1   | 2267.6                          | 11.4                                                                         | 64.2                                                                                                          | 12.4                                                                                                   |
| 2   | 2323.7                          | 40.0                                                                         | 62.4                                                                                                          | 42.2                                                                                                   |
| 3   | 2379.8                          | 80.0                                                                         | 60.7                                                                                                          | 82.0                                                                                                   |
| 4   | 2435.8                          | 100.0                                                                        | 59.2                                                                                                          | 100                                                                                                    |
| 5   | 2491.9                          | 80.0                                                                         | 57.6                                                                                                          | 77.8                                                                                                   |
| 6   | 2548.0                          | 40.0                                                                         | 56.2                                                                                                          | 38.0                                                                                                   |
| 7   | 2604.0                          | 11.4                                                                         | 54.8                                                                                                          | 10.6                                                                                                   |
| 8   | 2660.1                          | 1.4                                                                          | 53.5                                                                                                          | 1.3                                                                                                    |

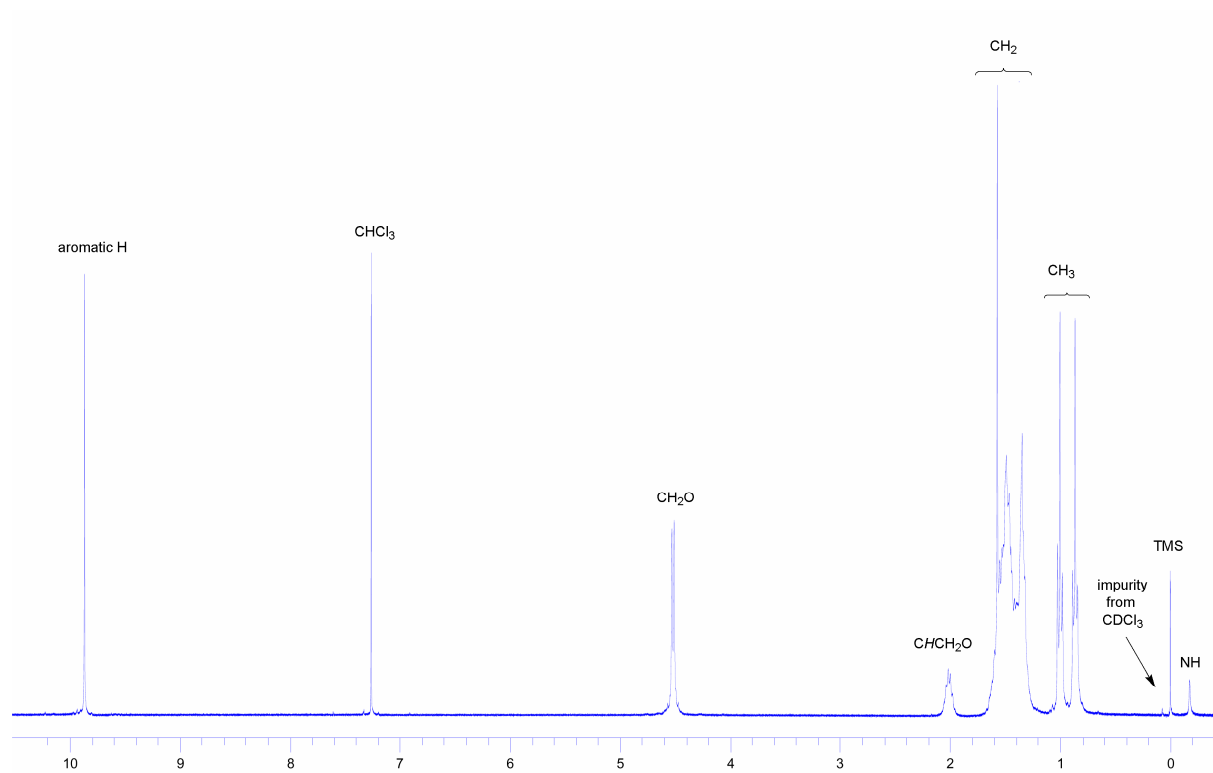

**Fig. SI 6**  $^1\text{H}$  NMR spectrum of **3b** (300 MHz, in  $\text{CDCl}_3$ , 25 °C)

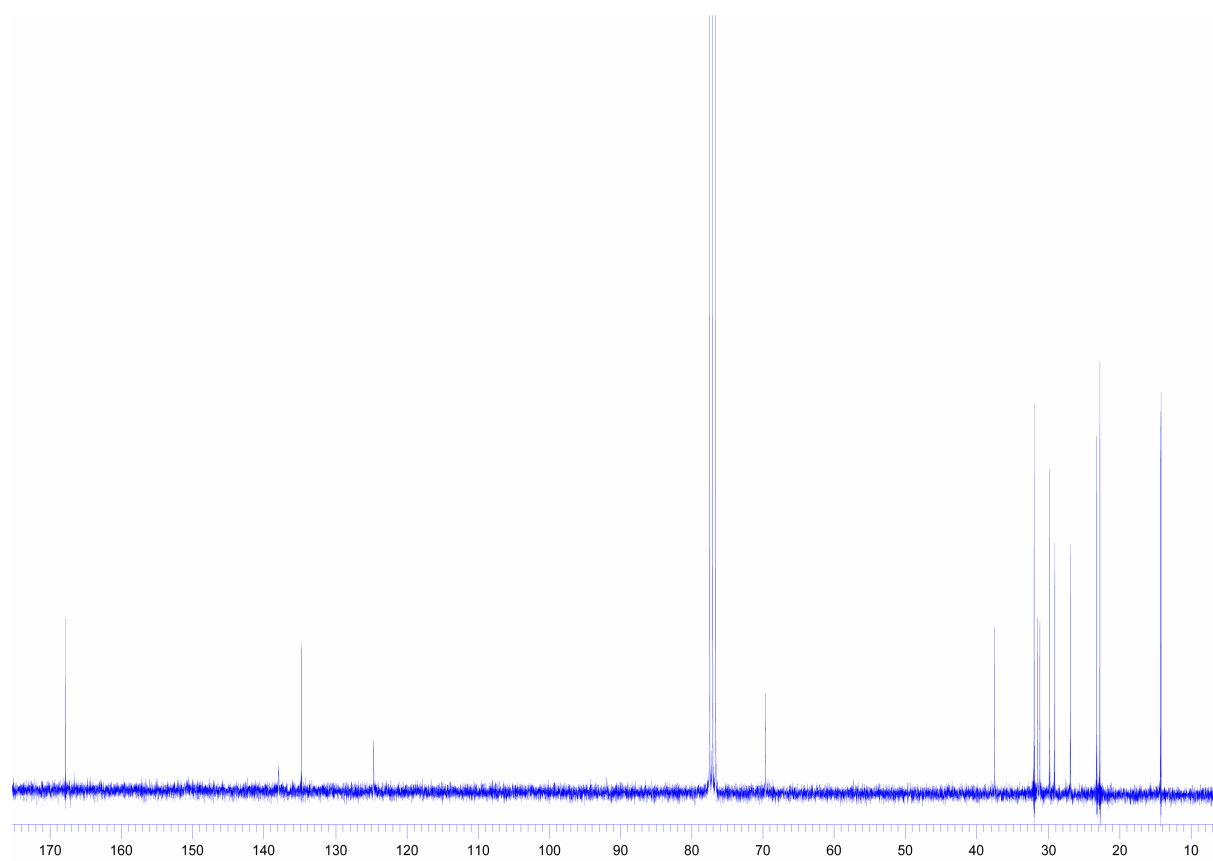

**Fig. SI 7**  $^{13}\text{C}$  NMR spectrum of **3b** (75 MHz, in  $\text{CDCl}_3$ , 25 °C)

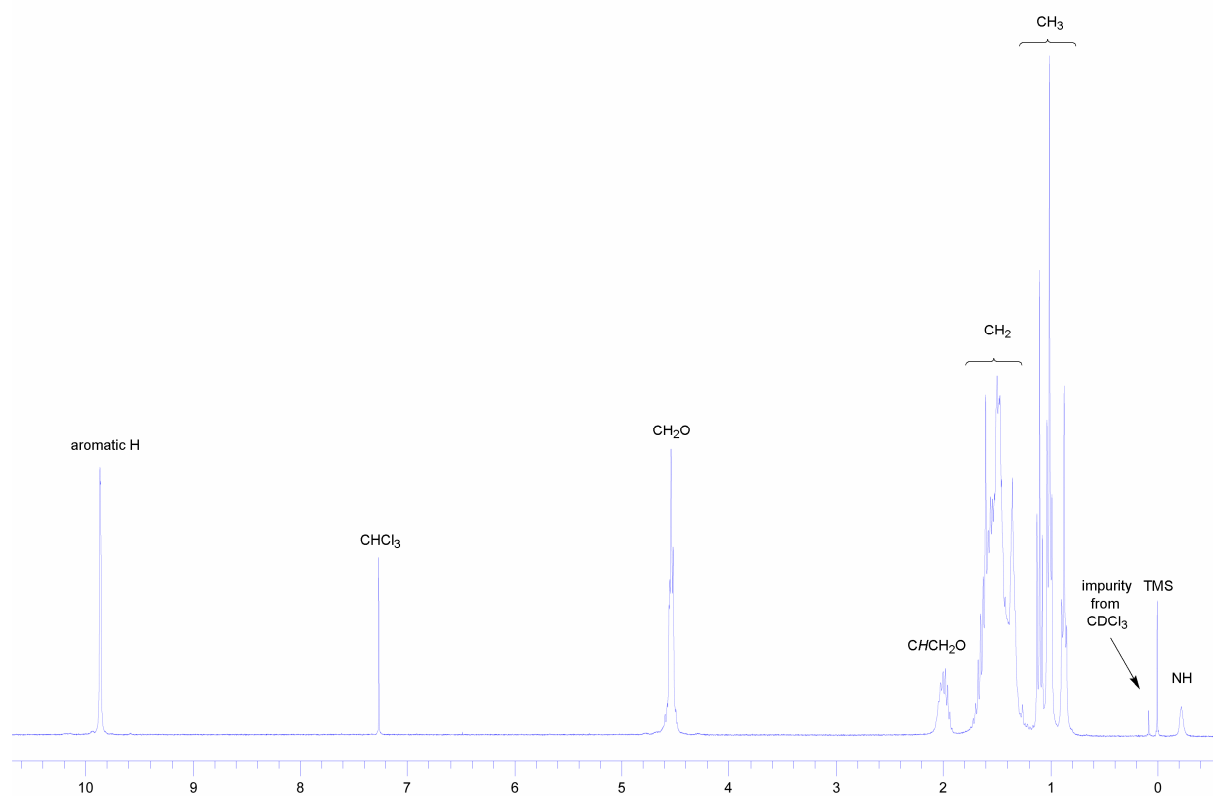

**Fig. SI 8**  $^1\text{H}$  NMR spectrum of **4** (300 MHz, in  $\text{CDCl}_3$ , 25 °C)

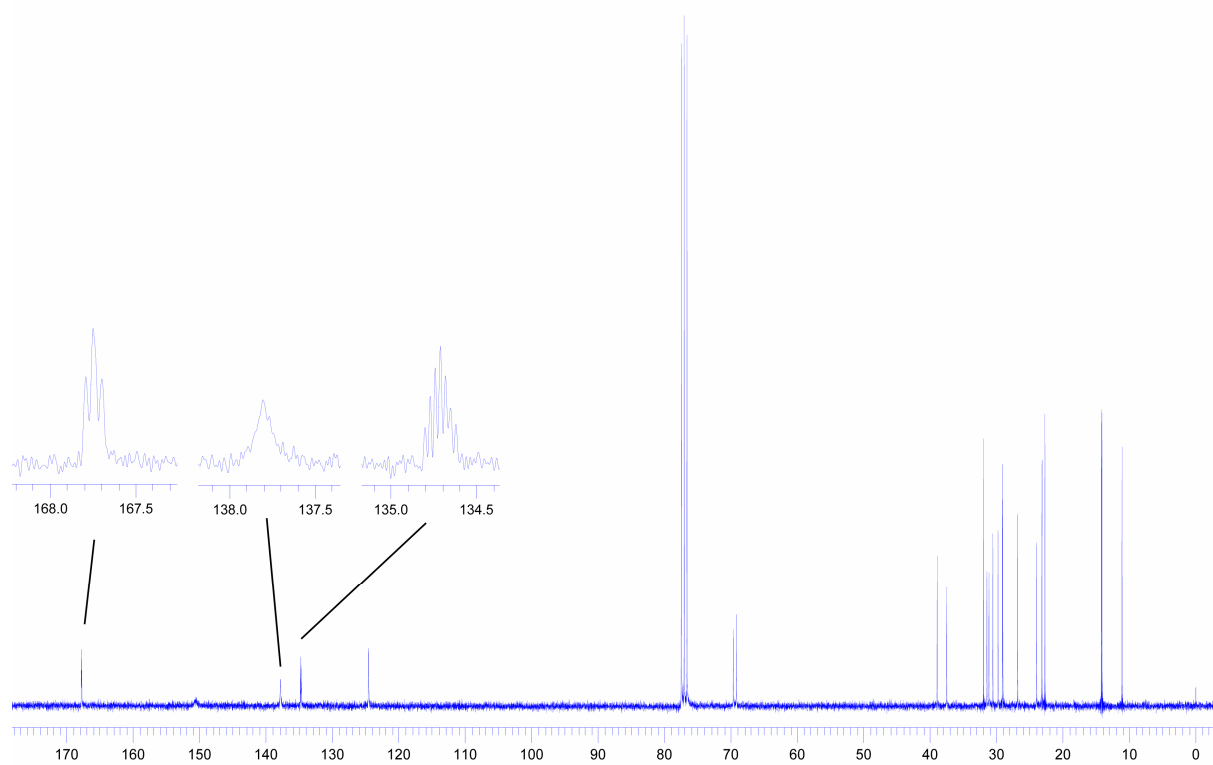

**Fig. SI 9**  $^{13}\text{C}$  NMR spectrum of **4** (75 MHz, in  $\text{CDCl}_3$ , 25 °C)

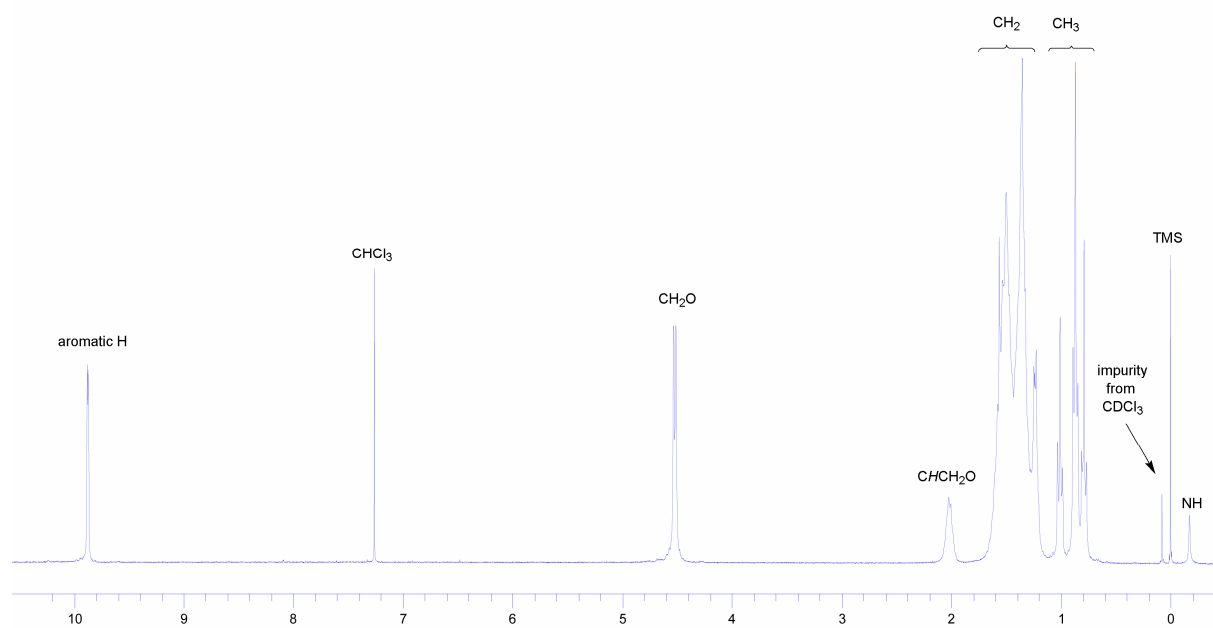

**Fig. SI 10**  $^1\text{H}$  NMR spectrum of **8** (300 MHz, in  $\text{CDCl}_3$ , 25 °C)

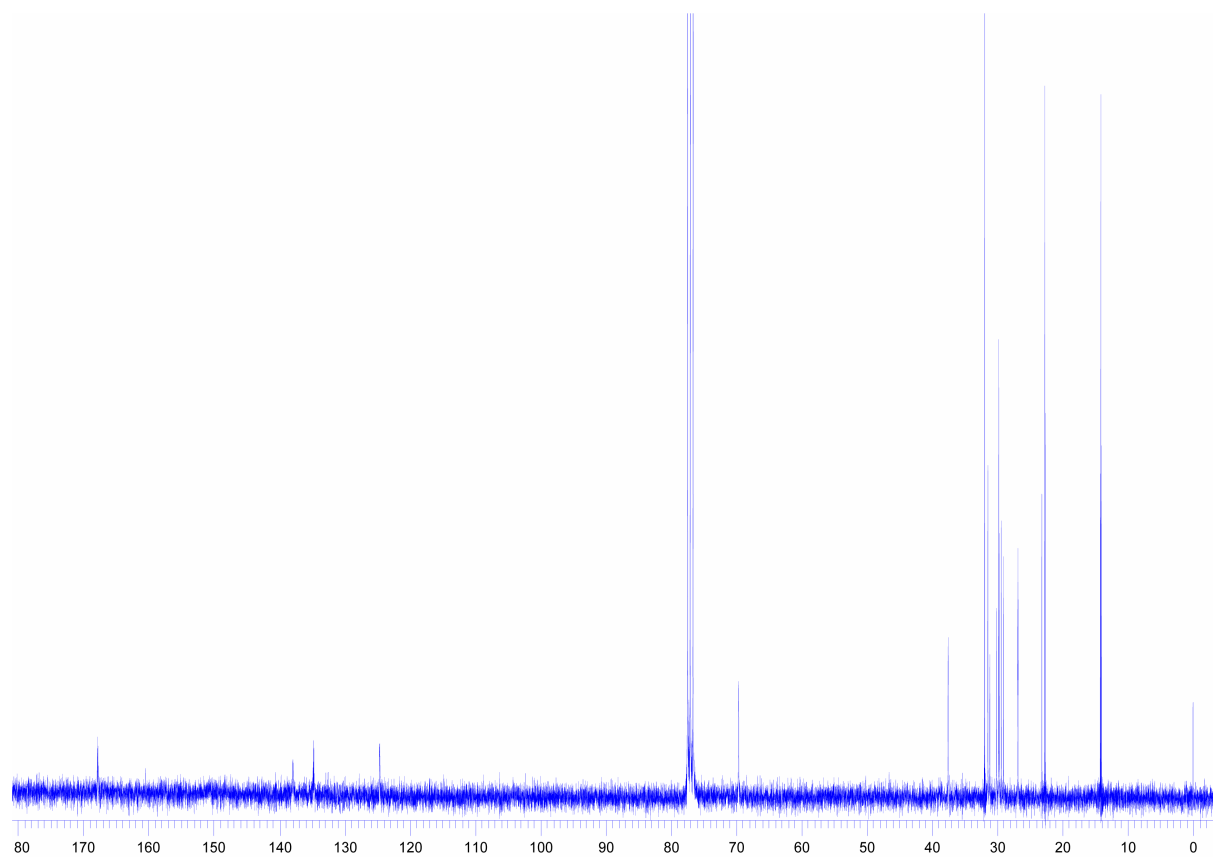

**Fig. SI 11**  $^{13}\text{C}$  NMR spectrum of **8** (75 MHz, in  $\text{CDCl}_3$ , 25 °C)



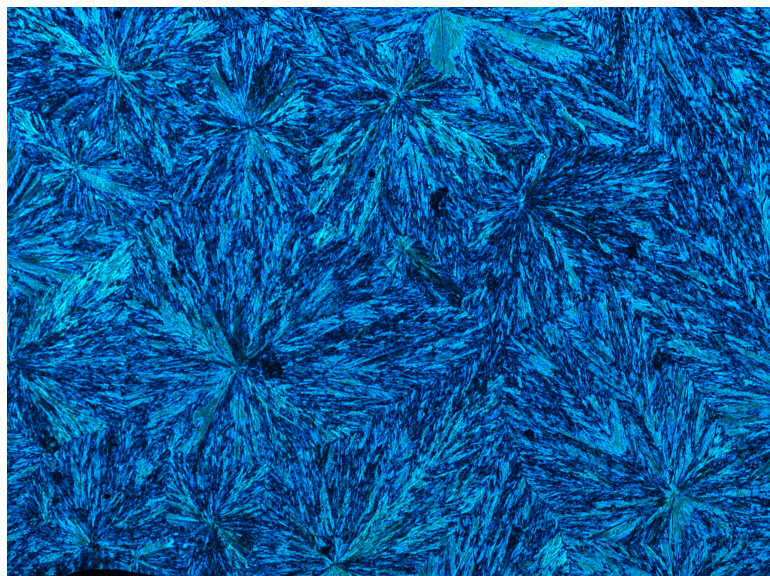

**Fig. SI 12** POM texture of **8** at 58 °C after cooling from the isotropic phase to the Col<sub>r</sub> phase.

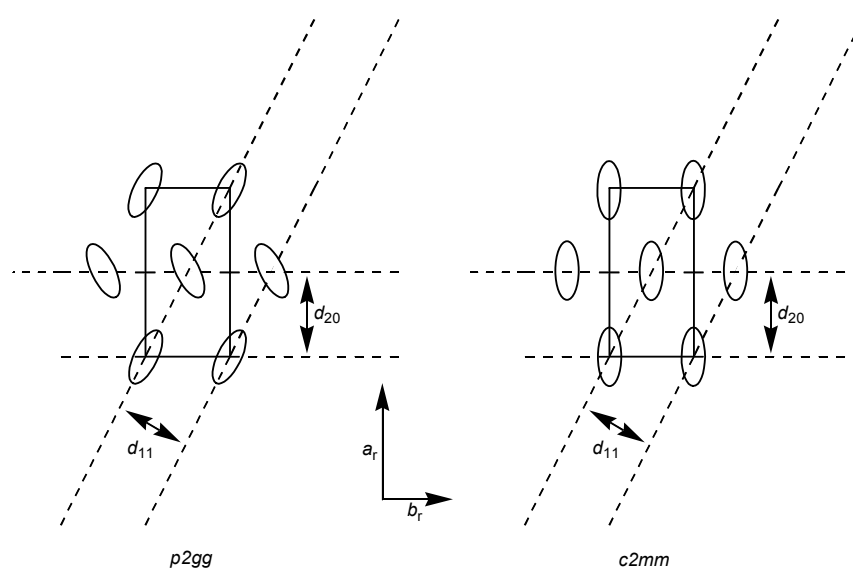

**Fig. SI 13** Schematic representation of two Col<sub>r</sub> phases possessing *p2gg* and *c2mm* plane symmetry.
